# Supplementary material
Source: HighWire-hosted journal article supplement (https://www.jneurosci.org/content/suppl/2009/07/15/29.28.9011)

**A**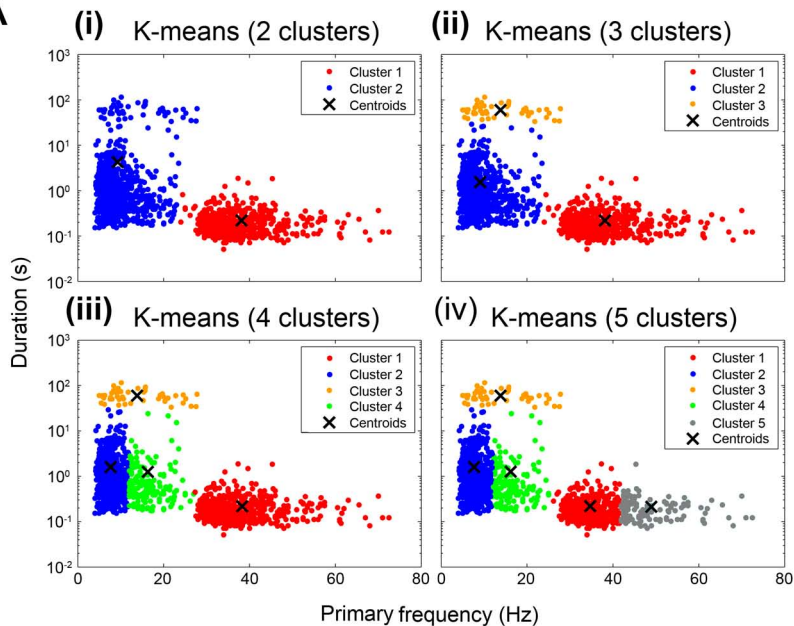**B**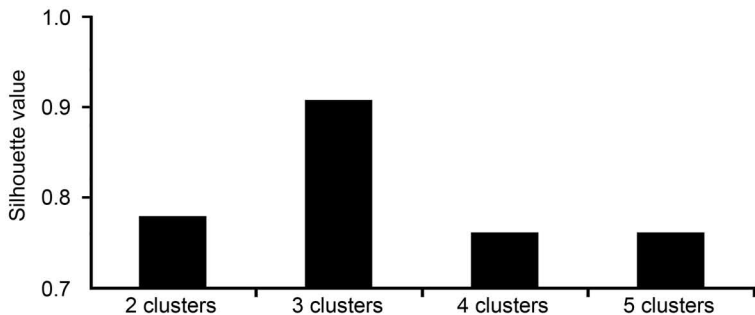

Supplement: Figure_S1.pdf [file Figure_S1.pdf]
